# Supplementary material for: Telomeres are elongated in older individuals in a hibernating rodent, the edible dormouse (Glis glis)
Source: PubMed Central journal article supplement (PMC5121655; doi:10.1038/srep36856), 2016-11-24
Supplement: srep36856-s1.pdf [file srep36856-s1.pdf]

**Telomeres are elongated in older individuals in a hibernating rodent, the edible dormouse (*Glis glis*).**

Franz Hoelzl<sup>1\*</sup>, Steve Smith<sup>1</sup>, Jessica S. Cornils<sup>1</sup>, Denise Aydinonat<sup>1</sup>, Claudia Bieber<sup>1</sup>, Thomas Ruf<sup>1</sup>

<sup>1</sup> Department of Integrative Biology and Evolution, University of Veterinary Medicine, Vienna, Austria

\* Correspondence and requests for materials should be addressed to F.H. (email: [franz.hoelzl@vetmeduni.ac.at](mailto:franz.hoelzl@vetmeduni.ac.at))

## Supplementary Information

Verhulst et al. (2013)<sup>1</sup> devised a method to correct for the regression to the mean when comparing baseline telomere length (X1) to follow up measures (X2) by computing a corrected value D. Below, we show an example for the correction of generated random number for X1 and X2 in the notation of R (R Core Team 2015)<sup>2</sup>. R code and output is shown in bold face.

As Verhulst et al. (2013)<sup>1</sup> we use function `mvrnorm` (Venables & Ripley 2002)<sup>3</sup> to generate correlated ( $r = 0.7$ ) random numbers

```
samples=20
```

```
r=0.7
```

```
library('MASS')
```

```
data=mvrnorm(n=samples, mu=c(10, 8), Sigma=matrix(c(1, r, r, 1), nrow=2),  
empirical=TRUE)
```

```
X1=data[, 1] # standard normal (mu=10, sd=1)
```

```
X2=data[, 2] # standard normal (mu=8, sd=1)
```

Next, we use the equations given by Verhulst et al. (2013)<sup>1</sup> to compute corrected values D. However, compared with Verhulst et al. (2013)<sup>1</sup> we switch variables X1 and X2 in order to obtain negative values of D for decreases in telomere length and positive values of D for increases:

```
rho=(2*r*sd(X1)*sd(X2))/(sd(X1)^2+sd(X2)^2)
```

```
D=(X2-mean(X2))-rho*(X1-mean(X1))
```

Alternatively, we can compute a linear model with X2 as the dependent, and X1 as an independent variable, and obtain the model residuals:

```
model=lm(X2~X1)
```

```
Resid=residuals(model)
```

To compare results of both approaches, values of D and residuals are combined to a data.frame:

```
result=data.frame(D,Resid)
head(result)
```

|   | D           | Resid       |
|---|-------------|-------------|
| 1 | -0.38532184 | -0.38532184 |
| 2 | -0.09824805 | -0.09824805 |
| 3 | 1.16125478  | 1.16125478  |
| 4 | 0.65028182  | 0.65028182  |
| 5 | -0.27865166 | -0.27865166 |
| 6 | -0.84631813 | -0.84631813 |

This shows that model residuals are identical to the correction suggested by Verhulst et al. (2013)<sup>1</sup>. Therefore, analyzing the effects of further independent variables will lead to virtually identical results: For instance, one may simulate a decrease of telomere length with increasing age:

```
age=runif(samples,1,15) # generate "ages" ranging from 1 to 15 years
X2=X2-0.1*age
```

The following code re-computes D-values and produces the (abbreviated) regression table of D as a function of age:

```
D=(X2-mean(X2))-rho*(X1-mean(X1))
model1=lm(D~age)
summary (model1)
```

Coefficients:

|             | Estimate | Std. Error | t value | Pr(> t )  |
|-------------|----------|------------|---------|-----------|
| (Intercept) | 0.78274  | 0.29714    | 2.634   | 0.0168 *  |
| age         | -0.11459 | 0.03634    | -3.153  | 0.0055 ** |

Very similar results can be obtained without computing D, by entering X1 as a covariate:

```
model2=lm(X2~X1+age)
summary(model2)
```

**Coefficients:**

|                    | <b>Estimate</b> | <b>Std. Error</b> | <b>t value</b> | <b>Pr(&gt; t )</b> |
|--------------------|-----------------|-------------------|----------------|--------------------|
| <b>(Intercept)</b> | <b>-1.61447</b> | <b>2.13725</b>    | <b>-0.755</b>  | <b>0.46035</b>     |
| <b>X1</b>          | <b>0.72738</b>  | <b>0.18436</b>    | <b>3.945</b>   | <b>0.00104 **</b>  |
| <b>age</b>         | <b>-0.11670</b> | <b>0.03998</b>    | <b>-2.919</b>  | <b>0.00957 **</b>  |

The slight differences between the estimated age effects occur for two reasons:

- 1) Computed P-values are based on the correct degrees of freedom only in model 2.
- 2) Only in model 2 all predictors are simultaneously adjusted for each other, which is desirable.

To illustrate the similarity of results from either method using empirical, rather than simulated data, we computed values of D as outlined above using our measurements of RTL at times t-1 as X1 and at times t as X2. Fig. S1 shows a partial regression plot of the effect of age on D, derived from a linear mixed effects model entering the same fixed and random effects (except for initial telomere length) as in our main analysis (c.f. Fig.2).

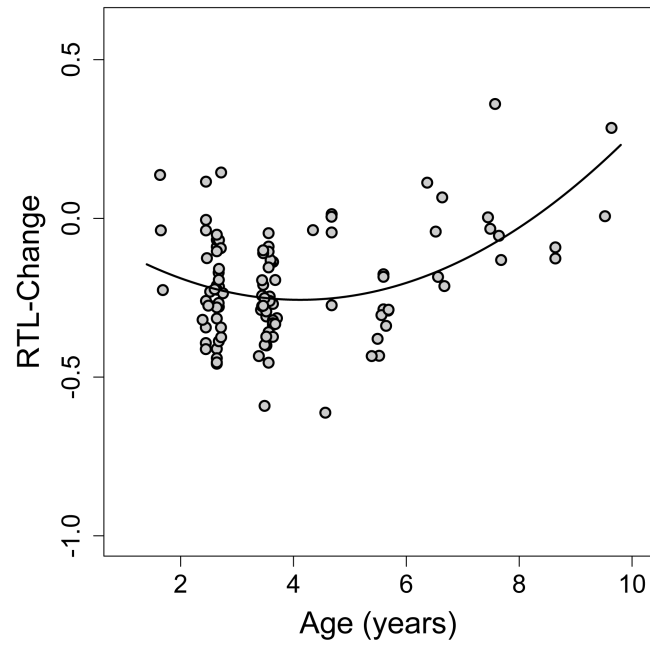

**Figure S1.** Partial effect of age on RTL-change. RTL-change was computed by correcting differences between subsequent measurements using the method of Verhulst et al. (2013)<sup>1</sup>. Results are almost identical to a model using RTL at time  $t$  as the response variable and RTL at time  $t-1$  as a covariate (see Fig. 2).

## References

- 1 Verhulst, S., Aviv, A., Benetos, A., Berenson, G. S. & Kark, J. D. Do leukocyte telomere length dynamics depend on baseline telomere length? An analysis that corrects for 'regression to the mean'. *Eur. J Epidemiol.* **28**, 859-866, doi:10.1007/s10654-013-9845-4 (2013).
- 2 R: A language and environment for statistical computing. R Foundation for Statistical Computing, Vienna, Austria (2015). <<http://www.R-project.org/>>.
- 3 Venables, W. N. & Ripley, B. D. *Modern Applied Statistics with S*. 4<sup>th</sup> edn (Springer, 2002). <<https://www.stats.ox.ac.uk/pub/MASS4/>>.
